# Supplementary material for: Age- and Severity-Associated Humoral Immunity Response in COVID-19 Patients: A Cohort Study from Wuhan, China
Source: MDPI journal article supplement (doi:10.3390/jcm11195974), 2022-10-10
Supplement: s1 [file s1]

## Supplementary Material

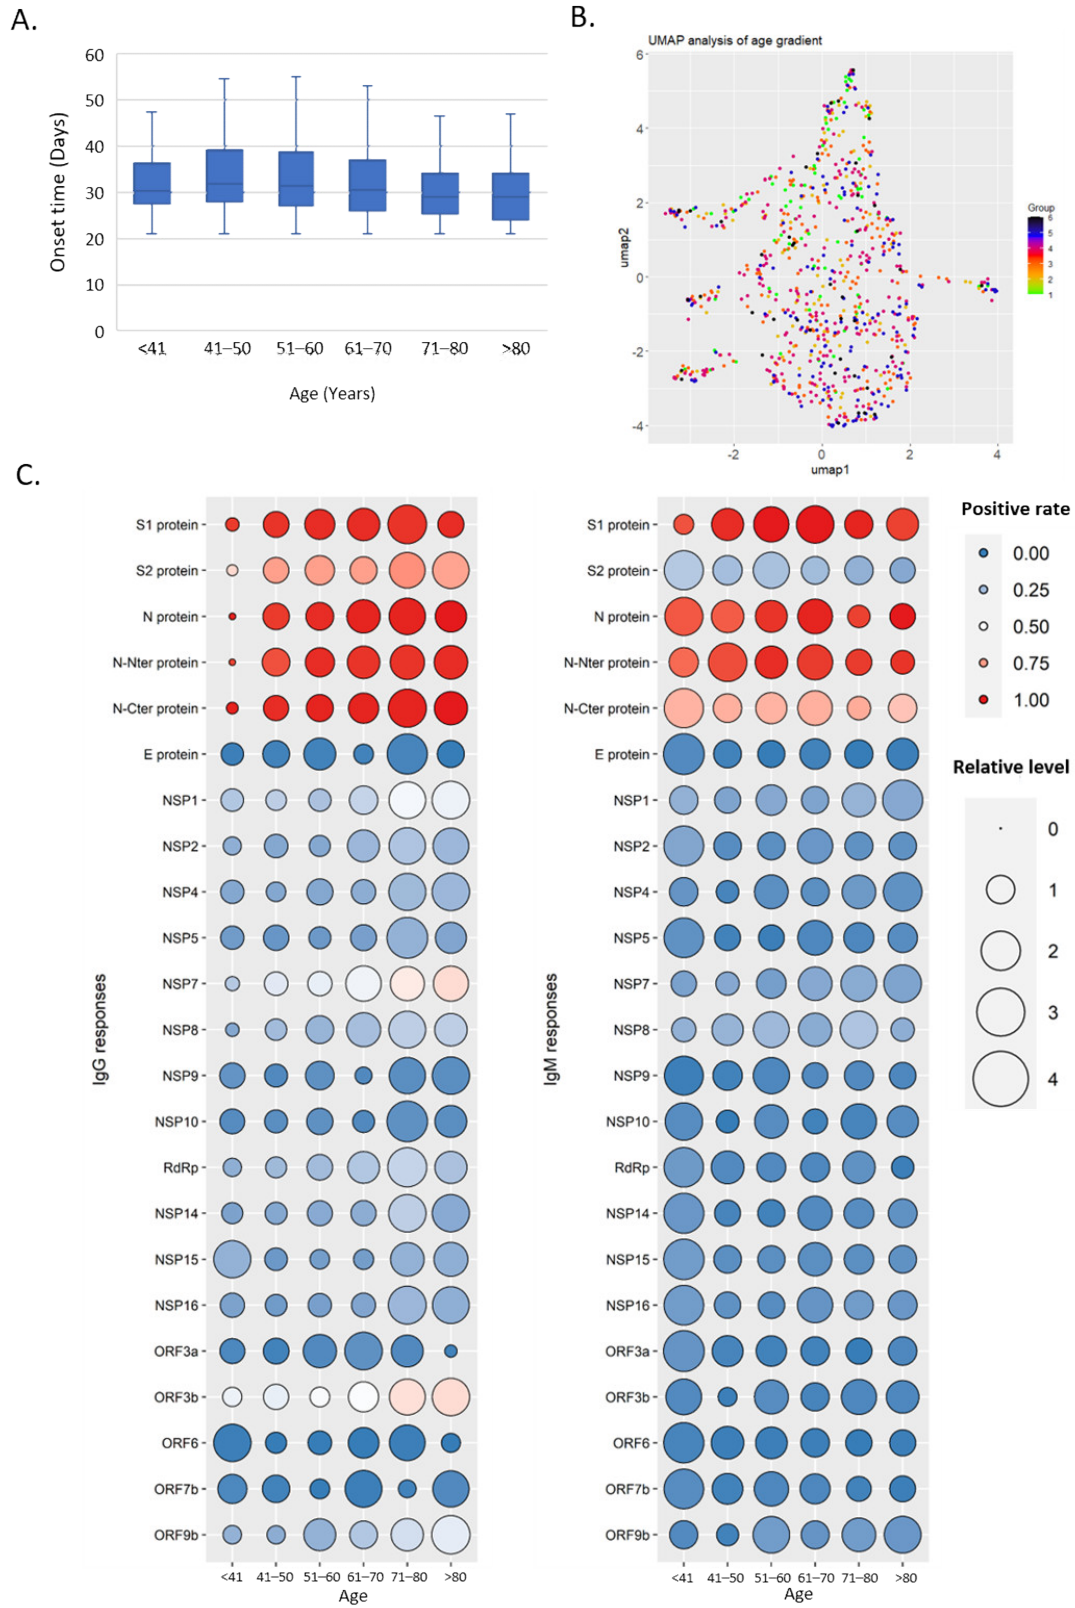

**Figure S1.** (A) The time of onset to sampling for COVID patients of 6 age groups. (B) UMAP analysis of IgG and IgM responses in different age groups. (C) The landscape of SARS-CoV-2 protein antibody responses in different age groups IgG and IgM.

**Table S1.** The chi-square test parameter of severity in association with gender among COVID-19 patients.

|           |   | Cases (n) | Mild patients, n (%) | Severe patients, n (%) | $\chi^2$ | P     |
|-----------|---|-----------|----------------------|------------------------|----------|-------|
| $\leq 40$ | F | 52        | 10 (19.2)            | 42 (80.8)              | 0.485    | 0.486 |
|           | M | 65        | 16 (24.6)            | 49 (75.4)              |          |       |
| 41–50     | F | 56        | 18 (32.1)            | 38 (67.9)              | 1.588    | 0.208 |
|           | M | 72        | 31 (43.1)            | 41 (56.9)              |          |       |
| 51–60     | F | 116       | 45 (38.8)            | 71 (61.2)              | 7.478    | 0.006 |
|           | M | 103       | 59 (57.3)            | 44 (42.7)              |          |       |
| 61–70     | F | 166       | 78 (47.0)            | 88 (53.0)              | 10.425   | 0.001 |
|           | M | 154       | 100 (64.9)           | 54 (35.1)              |          |       |
| 71–80     | F | 104       | 59 (56.7)            | 45 (43.3)              | 7.740    | 0.005 |
|           | M | 94        | 71 (75.5)            | 23 (24.5)              |          |       |
| > 80      | F | 34        | 22 (64.7)            | 12 (35.3)              | 0.359    | 0.549 |
|           | M | 35        | 25 (71.4)            | 10 (28.6)              |          |       |

**Table S2.** The binary logistic regression parameter of severity and outcome in association with the medical history among COVID-19 patients.

| Medical history        | Severity |       |               |                      |       | Overcome |       |               |                       |       |
|------------------------|----------|-------|---------------|----------------------|-------|----------|-------|---------------|-----------------------|-------|
|                        | $\beta$  | S.E.  | Wald $\chi^2$ | OR (95% CI)          | P     | $\beta$  | S.E.  | Wald $\chi^2$ | OR (95% CI)           | P     |
| None                   |          |       |               | 1.000                |       |          |       |               | 1.000                 |       |
| Hypertension           | 0.828    | 0.139 | 35.341        | 2.288 (1.742, 3.006) | 0.000 | 0.036    | 0.265 | 0.018         | 1.036 (0.026, 0.341)  | 0.893 |
| Diabetes mellitus      | 0.844    | 0.176 | 22.896        | 2.325 (1.646, 3.285) | 0.000 | 0.281    | 0.310 | 0.821         | 1.325 (0.142, 0.673)  | 0.365 |
| Respiratory diseases   | 0.144    | 0.459 | 0.098         | 1.154 (0.470, 2.837) | 0.754 | 0.392    | 0.766 | 0.262         | 1.480 (0.147, 0.628)  | 0.609 |
| Cardiovascular disease | 1.120    | 0.243 | 21.330        | 3.065 (1.905, 4.930) | 0.000 | 0.954    | 0.334 | 8.175         | 2.595 (1.350, 4.991)  | 0.004 |
| Cancer                 | 1.171    | 0.462 | 6.412         | 3.225 (1.303, 7.982) | 0.011 | 1.309    | 0.536 | 5.963         | 3.701 (1.295, 10.579) | 0.015 |

**Table S3.** Enrichment statistical analysis for the patients with high S1 IgG responses.

| Age   | Case (n) | Fold enrichments | p value |
|-------|----------|------------------|---------|
| <41   | 5        | 0.220            | 1.000   |
| 41–50 | 13       | 0.503            | 0.994   |
| 51–60 | 39       | 1.086            | 0.549   |
| 61–70 | 71       | 1.146            | 0.038   |
| 71–80 | 48       | 1.438            | 0.001   |
| >80   | 10       | 0.772            | 0.411   |
